# Supplementary material for: NdhV subunit regulates the activity of type-1 NAD(P)H dehydrogenase under high light conditions in cyanobacterium Synechocystis sp. PCC 6803
Source: PubMed Central journal article supplement (PMC4916593; doi:10.1038/srep28361), 2016-06-22
Supplement: srep28361-s1.pdf [file srep28361-s1.pdf]

NdhV subunit regulates the activity of type-1 NAD(P)H dehydrogenase under high light conditions in cyanobacterium *Synechocystis* sp. PCC 6803

Xin Chen, Zhihui He, Min Xu, Lianwei Peng, Hualing Mi



**Figure 1S.** Analysis of accumulation of Ndh subunits in WT and  $\Delta ndhV$  strains. (A) Immunodetection of Ndh subunits in total proteins, supernatant and thylakoid membranes of WT and  $\Delta ndhV$  mutants in pH 6.5. Each sample was obtained from the cells cultured in pH 6.5. Immunoblotting was performed using antibodies against Ndh subunits (NdhH, NdhI, NdhK, NdhM and NdhV). Each lane was loaded with 30  $\mu$ g proteins. (B) Immunodetection of Ndh subunits in total proteins, supernatant and thylakoid membranes of WT and  $\Delta ndhV$  mutants pH 8.0. Each sample was obtained from the cells cultured in pH 8.0. Immunoblotting was performed using antibodies against Ndh subunits (NdhH, NdhI, NdhK, NdhM and NdhV). Each lane was loaded with 30  $\mu$ g proteins.

## Supplemental Table 1

### Primers List and Sequence

#### Primers used to construct the pMD-19T- $\Delta$ *ndhV* vector

| Name               | Sequence (5'-3')                  | Description                                |
|--------------------|-----------------------------------|--------------------------------------------|
| <i>ndhV</i> -up-F  | GAGCCTGAGCCAATTGAGCCG             | Amplification of upstream region           |
| <i>ndhV</i> -up-R  | ACAACGTGGCTTTCCCACTGCGGGGGTTAGCTT |                                            |
| <i>ndhV</i> -mid-F | CCGCAGTGGGAAAGCCACGTTGTGTCTCA     | Amplification of kanamycin resistance gene |
| <i>ndhV</i> -mid-R | GGGCTTCTCTTCGGGCGCTGAGGTCTGCCTCG  |                                            |
| <i>ndhV</i> -Dn-F  | CTCAGCGCCGAAGAGAAGCCCTCACCGA      | Amplification of downstream region         |
| <i>ndhV</i> -Dn-R  | TAGGTTTGATGGTGCTGCG               |                                            |

#### Primers used to construct vectors to express protein to raise NdhV antibody.

| Name                 | Sequence (5'-3')                  | Description   |
|----------------------|-----------------------------------|---------------|
| <i>ndhV</i> -F-KpnI  | CGGGGTACCGGTGGCGCTATCCCTTTTACG    | NdhV antibody |
| <i>ndhV</i> -R-BamHI | GCCGGATCCGGGTTGCCCCCTAGCCATTTTTGA |               |
